# Supplementary material for: MobCal-MPI 2.0: an accurate and parallelized package for calculating field-dependent collision cross sections and ion mobilities
Source: Royal Society of Chemistry journal article supplement (doi:10.1039/d3an00545c), 2023-01-01
Supplement: d3an00545c1.xlsx [file d3an00545c1.xlsx]

## Sheet: CalibrationSet
Chemical Entity	Formula	InCHI Key	Mass / Da	Experimental CCS / A^2	Boltzmann Weighted CCS / A^2	Avg MobCal St Dev / A^2	% Difference		RMSE / % (Avg-N2)
1,2,4,5-Benzenetetramine	C6H10N4	ANUAIBBBDSEVKN-UHFFFAOYSA-N	139.05	123	128.15	1.25587	4.18699		2.25595
3H-1,2-Dithiole-3-Thione	C3H2S3	LZENMJMJWQSSNJ-UHFFFAOYSA-N	134.939	120.447	116.15	1.27765	3.56768
6,7-Dichloroquinoxaline-2,3-Diol	C8H4Cl2N2O2	AVBSIKMUAFYZAV-UHFFFAOYSA-N	230.972	142.98	140.69	1.49131	1.60183
2-aminoethylphosphate	C2H6NO4P	SYLKQIHLJRQWAY-UHFFFAOYSA-L	142.03	123.21	124.81	1.37291	1.2986
2-mercaptobenzothiazole	C7H5NS2	YXIWHUQXZSMYRE-UHFFFAOYSA-N	167.994	126.414	127.33	1.3115	0.724771
3,4,5-Tribromopyridine	C5H2Br3N	CWYVUHWKGWQPLP-UHFFFAOYSA-N	313.78	132.3	131.73	1.42268	0.430839
4-Aminosalicylic Acid (N-protonated)	C7H7NO3	WUBBRNOQWQTFEX-UHFFFAOYSA-N	154.05	139.2	141.48	1.59872	1.63793
4-Aminosalicylic Acid (O-protonated)	C7H7NO3	WUBBRNOQWQTFEX-UHFFFAOYSA-N	154.05	126.2	125.09	1.35097	0.879556
5,7-Dichloroquinolin-8-ol	C9H5Cl2NO	WDFKMLRRRCGAKS-UHFFFAOYSA-N	213.98	133	133.54	1.3354	0.406015
9,9-Dimethyl-9,10-Dihydroacridine	C15H15N	JSEQNGYLWKBMJI-UHFFFAOYSA-N	210.13	145	144.02	1.32498	0.675862
9(10H)-Acridone	C13H9NO	FZEYVTFCMJSGMP-UHFFFAOYSA-N	196.08	134.6	134.03	1.39391	0.423477
Acetaminophen	C8H9NO2	RZVAJINKPMORJF-UHFFFAOYSA-N	152.1	131.1	132.722	1.43208	1.23728
Acetohexamide	C15H20N2O4S	VGZSUPCWNCWDAN-UHFFFAOYSA-N	325.122	178.186	181.366	1.81366	1.78505
Acetylcholine	C7NH16O2+	OIPILFWXSMYKGL-UHFFFAOYSA-N	147.12	127.8	126.14	1.1731	1.2989
Albendazole	C12H15N3O2S	HXHWSAZORRCQMX-UHFFFAOYSA-N	266.096	161.991	164.28	1.60994	1.41313
Alprendolol	C15H24ClNO2	PAZJSJFMUHDSTF-UHFFFAOYSA-N	250.195	158.585	164.291	1.54381	3.59837
Amantadine	C10H17N	DKNWSYNQZKUICI-UHFFFAOYSA-N	152.14	136	132.5	1.643	2.57353
Ambroxol	C13H18Br2N2O	JBDGDEWWOUBZPM-UHFFFAOYSA-N	376.986	171.039	167.97	1.67969	1.79403
Aminothiazole	C3H4N2S	RAIPHJJURHTUIC-UHFFFAOYSA-N	101.017	117.217	115.69	1.1569	1.30249
Amiodarone	C25H29I2NO3	IYIKLHRQXLHMJQ-UHFFFAOYSA-N	646.031	226.28	231.332	2.1577	2.23229
Amodiaquine	C20H22ClN3O	OVCDSSHSILBFBN-UHFFFAOYSA-N	356.152	191.937	192.021	1.87768	0.0437808
Amoxapine	C17H16ClN3O	QWGDMFLQWFTERH-UHFFFAOYSA-N	314.106	171.19	170.91	1.55528	0.163376
Anagrelide	C10H7Cl2N3O	OTBXOEAOVRKTNQ-UHFFFAOYSA-N	256.004	147.899	150.061	1.44099	1.46209
Azelastine	C22H24ClN3O	MBUVEWMHONZEQD-UHFFFAOYSA-N	382.168	192.697	196.747	1.78798	2.10165
Beclamide	C10H12ClNO	JPYQFYIEOUVJDU-UHFFFAOYSA-N	198.068	142.266	141.499	1.37884	0.538694
Benzbromarone	C17H12Br2O3	WHQCHUCQKNIQEC-UHFFFAOYSA-N	422.923	176.027	168.865	1.83778	4.06879
Betamethasone	C22H29FO5	UREBDLICKHMUKA-DVTGEIKXSA-N	392.2	189.6	182.8	1.90112	3.5865
Betamethasone Phosphate	C22H28FO8P	VQODGRNSFPNSQE-DVTGEIKXSA-N	472.166	201.103	197.072	2.11015	2.00448
Bretylium	C11H17BrN	AAQOQKQBGPPFNS-UHFFFAOYSA-N	243.062	140.573	138.781	1.48399	1.27481
Brombuterol	C12H18Br2N2O	PLFUBWPEUSILSL-UHFFFAOYSA-N	364.986	167	162.549	1.72834	2.66507
Bromhexine	C14H20Br2N2	OJGDCBLYJGHCIH-UHFFFAOYSA-N	375.007	168.519	162.468	1.67403	3.591
Bromocriptine	C32H40BrN5O5	OZVBMTJYIDMWIL-AYFBDAFISA-N	654.229	244.447	256.241	2.20894	4.82461
Bromopride	C14H22BrN3O2	GIYAQDDTCWHPPL-UHFFFAOYSA-N	344.097	173.634	171.767	1.76882	1.07487
Bromperidol	C21H23BrFNO2	RKLNONIVDFXQRX-UHFFFAOYSA-N	420.097	194.931	192.68	2.04241	1.1549
Brompheniramine	C16H19BrN2	ZDIGNSYAACHWNL-UHFFFAOYSA-N	319.08	166.3	166.379	1.92938	0.0474005
Broxyquinoline	C9H5Br2NO	ZDASUJMDVPTNTF-UHFFFAOYSA-N	301.881	137.698	135.89	1.57632	1.31289
Bupropion	C13H18ClNO	SNPPWIUOZRMYNY-UHFFFAOYSA-N	240.115	157.466	154.99	1.5809	1.57251
Carbamazepine	C15H12N2O	FFGPTBGBLSHEPO-UHFFFAOYSA-N	237.1	147	149.08	1.35663	1.41497
Carbazole	C12H9N	UJOBWOGCFQCDNV-UHFFFAOYSA-N	168.08	129.3	135.5	1.36855	4.79505
Carbimazole	C7H10N2O2S	CFOYWRHIYXMDOT-UHFFFAOYSA-N	187.054	134.362	129.82	1.25925	3.38062
Carbinoxamine	C16H19ClN2O	OJFSXZCBGQGRNV-UHFFFAOYSA-N	291.126	167.384	168.948	1.78847	0.934357
Celecoxib	C17H14F3N3O2S	RZEKVGVHFLEQIL-UHFFFAOYSA-N	382.083	186.121	188.99	1.64421	1.5414
Chlorcyclizine	C18H21ClN2	WFNAKBGANONZEQ-UHFFFAOYSA-N	301.147	173.374	174.78	1.5905	0.811142
Chlormadinone Acetate	C23H29ClO4	QMBJSIBWORFWQT-DFXBJWIESA-N	405.183	197.026	193.183	2.11797	1.95017
Chloroguanide	C11H16ClN5	SSOLNOMRVKKSON-UHFFFAOYSA-N	254.117	161.011	160.252	1.82245	0.471664
Chloroxine	C9H5Cl2NO	WDFKMLRRRCGAKS-UHFFFAOYSA-N	213.982	134.26	133.16	1.4381	0.818875
(+)-Chlorpheniramine	C16H19ClN2	SOYKEARSMXGVTM-HNNXBMFYSA-N	275.131	163.461	162.97	1.56451	0.300176
Chlorpyramine	C16H20ClN3	ICKFFNBDFNZJSX-UHFFFAOYSA-N	290.142	167.934	171.111	1.69677	1.89168
Chlortetracycline	C22H23ClN2O8	DHPRQBPJLMKORJ-XRNKAMNCSA-N	479.122	197.802	199.22	1.89259	0.716913
Choline	C5H14NO+	DHPRQBPJLMKORJ-XRNKAMNCSA-N	104.108	115.4	113.51	1.1124	1.63778
Chloroacetoxyquinoline	C11H8ClNO2	JSJOTZXJKCXWQC-UHFFFAOYSA-N	222.032	141.089	136.93	1.28714	2.94747
Clemizole	C19H20ClN3	CJXAEXPPLWQRFR-UHFFFAOYSA-N	326.142	179.771	178.692	1.69658	0.600292
Clenbuterol	C12H18Cl2N2O	STJMRWALKKWQGH-UHFFFAOYSA-N	277.087	164.445	163.74	1.71927	0.428942
Clobetasol 17-Propionate	C25H32ClFO5	CBGUOGMQLZIXBE-XGQKBEPLSA-N	467.2	205.141	205.696	2.18038	0.270762
Clofazimine	C27H22Cl2N4	WDQPAMHFFCXSNU-UHFFFAOYSA-N	473.13	216.787	220.02	1.98018	1.49114
Clofibric Acid	C10H11ClO3	TXCGAZHTZHNUAI-UHFFFAOYSA-N	215.047	146.585	147.45	1.62195	0.590194
Clomipramine	C19H23ClN2	GDLIGKIOYRNHDA-UHFFFAOYSA-N	315.162	173.234	171.107	1.50879	1.22747
Cloperastine	C20H24ClNO	FLNXBVJLPJNOSI-UHFFFAOYSA-N	330.162	180.414	184.592	1.64284	2.31598
Clopidol	C7H7Cl2NO	ZDPIZLCVJAAHHR-UHFFFAOYSA-N	191.998	131.206	126.39	1.32709	3.67065
Clorgiline	C13H15Cl2NO	BTFHLQRNAMSNLC-UHFFFAOYSA-N	272.06	157.014	156.388	1.66877	0.398595
Cloxyquin	C9H6ClNO	CTQMJYWDVABFRZ-UHFFFAOYSA-N	180.021	129.522	131.74	1.38327	1.71221
Clozapine	C18H19ClN4	ZUXABONWMNSFBN-UHFFFAOYSA-N	327.137	177.536	175.97	1.63652	0.882261
Colchicine	C22H25NO6	IAKHMKGGTNLKSZ-INIZCTEOSA-N	400.18	193.2	193.175	1.91243	0.0130664
Cyclobromobridge (Bromo-3-hydroxy-4-(succin-2-yl)-caryolane gamma-lactone)	C19H27BrO4	CWCXONZIEDNVKI-PQBTTZHESA-N	399.117	183.389	178.472	1.93359	2.68109
Cyproterone 17-O-Acetate	C24H29ClO4	UWFYSQMTEOIJJG-FDTZYFLXSA-N	417.183	199.368	193.391	2.02813	2.99758
Dapsone	C12H12N2O2S	MQJKPEGWNLWLTK-UHFFFAOYSA-N	249.069	151.709	151.34	1.63447	0.243324
Demeclocycline	C21H21ClN2O8	GUXHBMASAHGULD-SEYHBJAFSA-N	465.106	195.948	197.37	1.75036	0.725904
Deracoxib	C17H14F3N3O3S	WAZQAZKAZLXFMK-UHFFFAOYSA-N	398.078	189.861	192.15	1.61406	1.20573
Dexamethasone	C22H29FO5	UREBDLICKHMUKA-CXSFZGCWSA-N	392.2	190.7	185.03	1.88731	2.97326
Dexamethasone Phosphate	C22H30FO8P	VQODGRNSFPNSQE-CXSFZGCWSA-N	472.166	200.623	199.443	2.11931	0.588154
Diatrizoic Acid	C11H9I3N2O4	YVPYQUNUQOZFHG-UHFFFAOYSA-N	614.777	176.281	184.1	1.91464	4.43525
Dichlorophene	C13H10Cl2O2	MDNWOSOZYLHTCG-UHFFFAOYSA-N	269.013	157.4	160.023	1.42426	1.66676
Dicrotophos	C8H16NO5P	VEENJGZXVHKXNB-VOTSOKGWSA-N	238.084	149.8	146.045	1.53406	2.50649
Diloxanide	C14H11Cl2NO4	GZZZSOOGQLOEOB-UHFFFAOYSA-N	328.014	171.726	177.548	1.82487	3.39009
Diltiazem	C22H26N2O4S	HSUGRBWQSSZJOP-RTWAWAEBSA-N	415.17	196.111	198.986	1.63223	1.46577
Disulfiram	C10H20N2S4	AUZONCFQVSMFAP-UHFFFAOYSA-N	297.06	165.48	161.348	1.6136	2.49732
Duloxetine	C18H19NOS	ZEUITGRIYCTCEM-KRWDZBQOSA-N	298.126	168.852	174.96	1.60966	3.61737
Econazole	C18H15Cl3N2O	LEZWWPYKPKIXLL-UHFFFAOYSA-N	381.032	184.751	181.394	1.66411	1.81709
Epinephrine	C9H13NO3	UCTWMZQNUQWSLP-VIFPVBQESA-N	184.1	141.5	141.36	1.55496	0.0989399
Erythrosine	C20H8I4O5	RAGZEDHHTPQLAI-UHFFFAOYSA-L	836.662	212.121	209.32	1.98847	1.32012
Ethionamide	C8H10N2S	AEOCXXJPGCBFJA-UHFFFAOYSA-N	167.064	135.814	134.279	1.42821	1.13035
Ethoxzolamide	C9H10N2O3S2	OUZWUKMCLIBBOG-UHFFFAOYSA-N	259.021	152.69	155.12	1.56671	1.59131
Eticlopride	C17H25ClN2O3	AADCDMQTJNYOSS-LBPRGKRZSA-N	341.163	181.535	182.58	1.99012	0.575797
Fenofibrate	C20H21ClO4	YMTINGFKWWXKFG-UHFFFAOYSA-N	361.12	190.511	193.887	2.09189	1.77206
Flufenamic Acid	C14H10F3NO2	LPEPZBJOKDYZAD-UHFFFAOYSA-N	282.07	156.1	158.923	1.60512	1.80821
Fosfosal	C7H7O6P	FFKUDWZICMJVPA-UHFFFAOYSA-N	217.998	138.434	133.905	1.39906	3.27182
Gangaleoidin	C18H14Cl2O7	RPHAAJGBADUATP-UHFFFAOYSA-N	413.019	186.415	183.51	1.78005	1.55824
Gliclazide	C15H21N3O3S	BOVGTQGAOIONJV-UHFFFAOYSA-N	324.138	177.975	177.665	1.77478	0.174338
Glufosinate	C5H12NO4P	IAJOBQBIJHVGMQ-UHFFFAOYSA-N	181.05	140.15	136.39	1.39118	2.68284
Griseofulvin	C17H17ClO6	DDUHZTYCFQRHIY-RBHXEPJQSA-N	353.079	178.628	183.053	1.54333	2.47706
Guanabenz	C8H8Cl2N4	WDZVGELJXXEGPV-YIXHJXPBSA-N	231.02	147.824	147.09	1.64741	0.496453
Guanfacine	C9H9Cl2N3O	INJOMKTZOLKMBF-UHFFFAOYSA-N	246.02	148.927	150.23	1.63751	0.875129
Guanine	C5H5N5O	UYTPUPDQBNUYGX-UHFFFAOYSA-N	152.06	125.9	132.999	1.42287	5.63874
Halcinonide	C24H32ClFO5	MUQNGPZZQDCDFT-JNQJZLCISA-N	455.2	200.879	198.005	2.08424	1.43067
Haloperidol	C21H23ClFNO2	LNEPOXFFQSENCJ-UHFFFAOYSA-N	376.147	191.693	191.347	1.81644	0.180575
Hydrocortisone Phosphate	C21H31O8P	BGSOJVFOEQLVMH-VWUMJDOOSA-N	442.176	200.147	196.379	2.19945	1.88272
Indomethacin	C19H16ClNO4	CGIGDMFJXJATDK-UHFFFAOYSA-N	358.084	179.039	183.13	1.79466	2.28473
Iodoquinol	C9H5I2NO	UXZFQZANDVDGMM-UHFFFAOYSA-N	397.853	143.729	138.67	1.53924	3.51966
Iopanoic Acid	C11H12I3NO2	OIRFJRBSRORBCM-UHFFFAOYSA-N	571.808	172.728	166.898	1.67495	3.37554
Ketotifen	C19H19NOS	ZCVMWBYGMWKGHF-UHFFFAOYSA-N	310.126	177.128	179.21	1.81002	1.1757
Leflunomide	C12H9F3N2O2	VHOGYURTWQBHIL-UHFFFAOYSA-N	271.07	153.7	155.372	1.5533	1.08798
Liothyronine	C15H12I3NO4	AUYYCJSJGJYCDS-LBPRGKRZSA-N	651.797	205.294	202.825	2.16623	1.20287
Loratadine	C22H23ClN2O2	JCCNYMKQOSZNPW-UHFFFAOYSA-N	383.152	185.793	201.18	1.77038	8.28198
Loxapine	C22H24ClN3O5	XJGVXQDUIWGIRW-UHFFFAOYSA-N	328.122	176.383	173.55	1.75286	1.60622
Meclizine	C25H27ClN2	OCJYIGYOJCODJL-UHFFFAOYSA-N	391.194	205.732	211.822	2.19269	2.96037
Meclofenamic Acid	C14H10Cl2NO2	SBDNJUWAMKYJOX-UHFFFAOYSA-N	296.024	156.951	157.769	1.47494	0.521242
Mefenamic acid	C15H15NO2	HYYBABOKPJLUIN-UHFFFAOYSA-N	242.12	150.9	152.733	1.47457	1.21445
Meloxicam	C14H12N3O4S2	ZRVUJXDFFKFLMG-UHFFFAOYSA-N	352.042	174.521	179.972	2.01561	3.12336
Mechlorethamine	C5H11Cl2N	HAWPXGHAZFHHAD-UHFFFAOYSA-N	156.03	126.457	125.38	1.31649	0.851299
Methimazole	C4H6N2S	PMRYVIKBURPHAH-UHFFFAOYSA-N	115.032	117.235	115.404	1.19425	1.56149
Methylene Blue	C16H18ClN3S	CXKWCBBOMKCUKX-UHFFFAOYSA-M	284.12	161.3	159	1.749	1.42591
Methyl 26-Dichloronicotinate	C7H5Cl2NO2	IFVVGOJYWCHRCT-UHFFFAOYSA-N	205.98	131.8	130.45	1.3045	1.02428
Meticrane	C10H13NO4S2	FNQQBFNIYODEMB-UHFFFAOYSA-N	276.036	159.406	155.073	1.44214	2.71819
Metobromuron	C9H11BrN2O2	WLFDQEVORAMCIM-UHFFFAOYSA-N	259.008	145.41	143.9	1.58297	1.03839
Metoclopramide	C14H22ClN3O2	TTWJBBZEZQICBI-UHFFFAOYSA-N	300.147	171.773	171.1	1.67678	0.391792
Nicergoline	C24H26BrN3O3	YSEXMKHXIOCEJA-FVFQAYNVSA-N	484.123	213.815	213.366	2.31815	0.209967
Nicotine	C10H14N2	SNICXCGAKADSCV-JTQLQIEISA-N	163.12	134	133.074	1.52441	0.690824
N-Ethyl Aniline	C8H11N	OJGMBLNIHDZDGS-UHFFFAOYSA-N	121.089	124.5	125.89	1.30926	1.11647
Ondansetron	C18H19N3O	FELGMEQIXOGIFQ-UHFFFAOYSA-N	294.2	172.7	167.482	1.39152	3.02152
Oxfendazole	C15H13N3O3S	BEZZFPOZAYTVHN-UHFFFAOYSA-N	316.075	174.059	179.271	1.86494	2.99421
Oxiconazole	C18H13Cl4N3O	QRJJEGAJXVEBNE-HKOYGPOVSA-N	427.989	193.083	191.932	1.69906	0.596208
Pantoprazole	C16H15F2N3O4S	IQPSEEYGBUAQFF-UHFFFAOYSA-N	384.082	183.358	183.195	1.89694	0.0887186
Paraquat	C12H14N2+2	INFDPOAKFNIJBF-UHFFFAOYSA-N	258.1	205	205.56	2.19949	0.273171
Penfluridol	C28H27ClF5NO	MDLAAYDRRZXJIF-UHFFFAOYSA-N	524.177	219.11	215.543	2.00229	1.62796
Pergolide	C19H26N2S	YEHCICAEULNIGD-MZMPZRCHSA-N	315.189	177.396	177.31	1.63125	0.0483906
Phosphocholine	C5H15NO4P+	YHHSONZFOIEMCP-UHFFFAOYSA-O	183.065	138.54	132.71	1.43327	4.20817
Piroxicam	C15H13N3O4S	QYSPLQLAKJAUJT-UHFFFAOYSA-N	332.07	170.677	175.44	1.89475	2.7907
Prednisolone Phosphate	C21H29O8P	JDOZJEUDSLGTLU-VWUMJDOOSA-N	440.16	197.771	193.753	2.17949	2.03135
Probenecid	C13H19NO4S	DBABZHXKTCFAPX-UHFFFAOYSA-N	286.111	161.436	166.11	1.62788	2.89525
Promazine	C17H20N2S	ZGUGWUXLJSTTMA-UHFFFAOYSA-N	285.142	161.363	159.04	1.47907	1.43933
Proquinazid	C14H17IN2O4	FLVBXVXXXMLMOX-UHFFFAOYSA-N	374.04	169.35	167.46	1.58787	1.11591
Prothionamide	C9H12N2S	VRDIULHPQTYCLN-UHFFFAOYSA-N	181.079	141.265	141.54	1.40125	0.19438
Pyrimethamine	C12H13ClN4	WKSAUQYGYAYLPV-UHFFFAOYSA-N	249.09	155.779	153.728	1.72175	1.31672
Pyritinol	C16H20N2O4S2	SIXLXDIJGIWWFU-UHFFFAOYSA-N	369.094	173.429	164.9	1.39842	4.91792
Rebamipide	C19H15ClN2O4	ALLWOAVDORUJLA-UHFFFAOYSA-N	371.079	185.014	192.38	1.90457	3.98128
Reserpine	C33H40N2O9	QEVHRUUCFGRFIF-MDEJGZGSSA-N	609.3	254.3	268.21	2.81621	5.46992
Ritanserin	C27H25F2N3OS	JUQLTPCYUFPYKE-UHFFFAOYSA-N	478.176	220.676	224.76	1.82056	1.85072
Sertraline	C17H17Cl2N	VGKDLMBJGBXTGI-SJCJKPOMSA-N	306.081	168.117	163.581	1.60311	2.69813
sn-Glycero-3-phosphocholine	C8H20NO6P	SUHOQUVVVLNYQR-MRVPVSSYSA-N	257.103	157.17	154.891	1.39466	1.45006
Sulfacetamide	C8H10N2O3S	SKIVFJLNDNKQPD-UHFFFAOYSA-N	215.048	146.916	143.549	1.38529	2.29123
Sulfasalazine	C18H14N4O5S	OQANPHBRHBJGNZ-FYJGNVAPSA-N	399.076	200.384	207.26	1.90679	3.43133
Sulfinpyrazone	C23H20N2O3S	MBGGBVCUIVRRBF-UHFFFAOYSA-N	405.127	193.452	202.59	2.08668	4.7238
Sulindac	C20H17FO3S	MLKXDPUZXIRXEP-MFOYZWKCSA-N	357.095	191.6	190.09	2.03396	0.788316
Sulmazole	C14H13N3O2S	XMFCOYRWYYXZMY-UHFFFAOYSA-N	288.08	166.385	167.685	1.80803	0.781119
(R)-Suprofen	C14H12O3S	MDKGKXOCJGEUJW-SECBINFHSA-N	261.058	157.205	158.21	1.66121	0.639514
Tenoxicam	C13H11N3O4S2	LZNWYQJJBLGYLT-UHFFFAOYSA-N	338.026	169.813	172.51	1.82861	1.58849
Tetraethylammonium	C8H20N+	CBXCPBUEXACCNR-UHFFFAOYSA-N	130.16	122.2	120.87	1.16035	1.08838
Tetramethylammonium	C4H12N+	QEMXHQIAXOOASZ-UHFFFAOYSA-N	74.097	107.4	108.45	1.07366	0.977654
Tetramisole	C11H12N2S	HLFSDGLLUJUHTE-UHFFFAOYSA-N	205.079	143.969	139.91	1.3991	2.81906
Thiabendazole	C10H7N3S	WJCNZQLZVWNLKY-UHFFFAOYSA-N	202.043	137.689	136.94	1.32832	0.544103
Thioridazine	C21H26N2S2	KLBQZWRITKRQQV-UHFFFAOYSA-N	371.161	185.012	183.71	1.74524	0.703535
Tiotixene	C23H29N3O2S2	GFBKORZTTCHDGY-UWVJOHFNSA-N	444.177	201.895	201.595	1.83407	0.148686
Thiram	C6H12N2S4	KUAZQDVKQLNFPE-UHFFFAOYSA-N	241	148.431	141	1.3959	5.00624
Thymine	C5H6N2O2	RWQNBRDOKXIBIV-UHFFFAOYSA-N	127.05	119.5	120.246	1.22861	0.624119
Tioxolone	C7H4O3S	SLYPOVJCSQHITR-UHFFFAOYSA-N	168.995	130.166	127	1.20104	2.43211
Tolbutamine	C12H18N2O3S	JLRGJRBPOGGCBT-UHFFFAOYSA-N	271.111	161.869	167.36	1.75728	3.39235
Tolfenamic acid	C14H12ClNO2	YEZNLOUZAIOMLT-UHFFFAOYSA-N	262.063	155.565	154.71	1.47748	0.549455
Tolnaftate	C19H17NOS	FUSNMLFNXJSCDI-UHFFFAOYSA-N	308.11	173.639	178.215	1.7793	2.63537
Tolazamide	C14H21N3O3S	OUDSBRTVNLOZBN-UHFFFAOYSA-N	312.138	173.317	172.874	1.65582	0.255299
Xylazine	C12H16N2S	BPICBUSOMSTKRF-UHFFFAOYSA-N	221.111	147.822	147.23	1.38396	0.400209
Zoxazolamine	C7H5ClN2O	YGCODSQDUUUKIV-UHFFFAOYSA-N	169.016	129.708	132.53	1.51084	2.1757

## Sheet: ValidationSet
Chemical Entity	Molecular formula	InChI Key	Mass / Da	Experimental CCS / A^2	Boltzmannn Weighted CCS / A^2	Avg MobCal St Dev / A^2	% Difference		RMSE / % (Avg-N2)
Amifostine	C5H15N2O3PS	JKOQGQFVAUAYPM-UHFFFAOYSA-N	215.061	146.922	140.021	1.43631	4.69721		2.16293
Azamethiphos	C9H10ClN2O5PS	VNKBTWQZTQIWDV-UHFFFAOYSA-N	324.981	160	158.431	1.556	0.980622
Benthiavalicarb	C15H18FN3O3S	VVSLYIKSEBPRSN-PELKAZGASA-N	340.113	173.38	173.134	1.59169	0.141714
(R)Bromchlorbuterol	C12H18BrClN2O	OWADKUMVZPHSHB-UHFFFAOYSA-N	321.036	165.2	159.686	1.76484	3.33789
(R)Bromuconazol	C13H12BrCl2N3O	HJJVPARKXDDIQD-UHFFFAOYSA-N	375.961	171.1	170.486	1.84515	0.358987
Buprofezin	C13H12BrCl2N3O	PRLVTUNWOQKEAI-UHFFFAOYSA-N	375.961	171.1	173.022	1.64641	1.12326
Butafenacil	C20H18ClF3N2O6	JEDYYFXHPAIBGR-UHFFFAOYSA-N	475.088	212.2	204.557	2.31568	3.6016
Carboxin	C12H13NO2S	GYSSRZJIHXQEHQ-UHFFFAOYSA-N	236.074	149.35	147.63	1.51961	1.15165
Chlorantraniliprole	C18H14BrCl2N5O2	PSOVNZZNOMJUBI-UHFFFAOYSA-N	481.978	198.3	198.834	1.84498	0.269149
Chlorbromuron	C9H10BrClN2O2	NLYNUTMZTCLNOO-UHFFFAOYSA-N	292.969	152.25	150.355	1.81889	1.24465
(S)Chlormezanone	C11H12ClNO3S	WEQAYVWKMWHEJO-UHFFFAOYSA-N	274.03	158.198	160.41	1.39091	1.39844
Chlorpromazine	C17H19ClN2S	ZPEIMTDSQAKGNT-UHFFFAOYSA-N	319.103	169.765	168.23	1.443	0.904328
Chlorpropamide	C10H13ClN2O3S	RKWGIWYCVPQPMF-UHFFFAOYSA-N	277.041	158.493	162.026	1.719	2.22933
Chlorprothixene	C18H18ClNS	WSPOMRSOLSGNFJ-AUWJEWJLSA-N	316.092	169.252	169.153	1.532	0.0582997
Chlorsulfuron	C12H12ClN5O4S	VJYIFXVZLXQVHO-UHFFFAOYSA-N	358.037	175.29	180.425	1.88638	2.92959
Clopidogrel	C16H16ClNO2S	GKTWGGQPFAXNFI-HNNXBMFYSA-N	322.066	167.741	170.445	1.61625	1.61248
Clothiandin	C6H8ClN5O2S	PGOOBECODWQEAB-UHFFFAOYSA-N	250.016	153.2	152.539	1.42589	0.431261
Demeton-S-methyl-sulfone	C6H15O5PS2	PZIRJMYRYORVIT-UHFFFAOYSA-N	263.017	143.66	143.155	1.55779	0.351833
Diafenoconazole	C19H17Cl2N3O3	BQYJATMQXGBDHF-UHFFFAOYSA-N	406.072	200.1	203.581	1.87194	1.73976
Diafenthiuron	C23H32N2OS	WOWBFOBYOAGEEA-UHFFFAOYSA-N	385.231	199.75	202.865	1.86075	1.55935
Diazinon	C12H21N2O3PS	FHIVAFMUCKRCQO-UHFFFAOYSA-N	305.108	173.5	175.672	1.51256	1.25192
Diazoxide	C8H7ClN2O2S	GDLBFKVLRPITMI-UHFFFAOYSA-N	230.999	143.73	143.837	1.594	0.0747126
Dichlorvos	C4H7Cl2O4P	OEBRKCOSUFCWJD-UHFFFAOYSA-N	220.953	133.07	135.414	1.38602	1.76113
(E)Dimethomorph	C21H22ClNO4	QNBTYORWCCMPQP-NBVRZTHBSA-N	388.131	200.6	198.396	1.83842	1.09849
Ethiprole	C13H9Cl2F3N4OS	FNELVJVBIYMIMC-UHFFFAOYSA-N	396.99	183.7	179.705	2.0627	2.17451
Ethoprophos	C8H19O2PS2	VJYFKVYYMZPMAB-UHFFFAOYSA-N	243.064	149.27	152.834	1.46259	2.38736
Fenamiphos sulfone	C13H22NO5PS	LVNYJXIBJFXIRZ-UHFFFAOYSA-N	336.103	179.48	183.496	1.768	2.23758
Fipronil	C12H4Cl2F6N4OS	ZOCSXAVNDGMNBV-UHFFFAOYSA-N	436.946	180.77	178.566	1.72599	1.21944
Flufenacet	C14H13F4N3O2S	IANUJLZYFUDJIH-UHFFFAOYSA-N	364.074	178.2	172.311	1.6509	3.30458
Hexythiazox	C17H21ClN2O2S	XGWIJUOSCAQSSV-XHDPSFHLSA-N	353.108	185.5	180.086	1.68579	2.91869
(R)Indapamide	C16H16ClN3O3S	NDDAHWYSQHTHNT-UHFFFAOYSA-N	366.067	184.63	186.712	1.85006	1.1279
Indoxacarb	C22H17ClF3N3O7	VBCVPMMZEGZULK-NRFANRHFSA-N	528.078	207.1	216.386	1.78804	4.48385
Malaoxon	C10H19O7PS	WSORODGWGUUOBO-UHFFFAOYSA-N	315.066	164.3	170.577	1.59231	3.8206
Mefenacet	C16H14N2O2S	XIGAUIHYSDTJHW-UHFFFAOYSA-N	299.085	168.6	167.774	1.72696	0.490175
Methamidophos	C2H8NO2PS	NNKVPIKMPCQWCG-UHFFFAOYSA-N	142.009	124	119.904	1.158	3.30323
Myclobutanil	C15H17ClN4	HZJKXKUJVSEEFU-UHFFFAOYSA-N	289.122	174.6	177.642	1.5277	1.74204
Novaluron	C17H9ClF8N2O4	NJPPVKZQTLUDBO-UHFFFAOYSA-N	493.02	196.9	202.879	2.31984	3.03636
Omethoate	C5H12NO4PS	PZXOQEXFMJCDPG-UHFFFAOYSA-N	214.03	138.6	138.257	1.47883	0.24719
Phosphamidon	C10H19ClNO5P	RGCLLPNLLBQHPF-HJWRWDBZSA-N	300.076	158.6	156.116	1.5381	1.56607
Pirimiphos-methyl	C11H20N3O3PS	QHOQHJPRIBSPCY-UHFFFAOYSA-N	306.104	168.1	168.855	1.64392	0.448937
Prometryn	C10H19N5S	AAEVYOVXGOFMJO-UHFFFAOYSA-N	242.143	163.3	158.86	1.48774	2.71872
Prosulfocarb	C14H21NOS	NQLVQOSNDJXLKG-UHFFFAOYSA-N	252.142	156.95	158.344	1.54352	0.8882
Pyridaben	C19H25ClN2OS	DWFZBUWUXWZWKD-UHFFFAOYSA-N	365.145	193.6	193.542	1.85805	0.0302142
Sulfentrazone	C11H10Cl2F2N4O3S	OORLZFUTLGXMEF-UHFFFAOYSA-N	386.989	173.63	173.495	1.71975	0.0779425
Temephos	C16H20O6P2S4	WWJZWCUNLNYYAU-UHFFFAOYSA-N	466.997	203.4	216.024	1.80808	6.20657
Thiacloprid	C10H9ClN4S	HOKKPVIRMVDYPB-UHFFFAOYSA-N	253.031	157.2	160.173	1.49123	1.89109
Thiamethoxam	C8H10ClN5O3S	NWWZPOKUUAIXIW-DHZHZOJOSA-N	292.027	160.3	157.752	1.37479	1.58926
Trichlorphon	C4H8Cl3O4P	NFACJZMKEDPNKN-UHFFFAOYSA-N	256.93	136.12	135.82	1.38265	0.220652
Triclabendazole	C14H9Cl3N2OS	NQPDXQQQCQDHHW-UHFFFAOYSA-N	358.957	179.333	178.464	1.983	0.484674
Vamidothion	C8H18NO4PS2	LESVOLZBIFDZGS-UHFFFAOYSA-N	288.049	158.8	157.948	1.53369	0.536664

## Sheet: DispPlotSet
Chemical Entity	Formula	InCHI Key	Mass / Da	A_fit	B_fit / Td
3-aminoquinoline	C9H8N2	SVNCRRZKBNSMIV-UHFFFAOYSA-N	145.08	0.037925	99.5721
3-bromoquinoline	C9H6BrN	ZGIKWINFUGEQEO-UHFFFAOYSA-N	208.96	0.0388568	104.665
3-hydroxycarbofuran	C12H15NO4	RHSUJRQZTQNSLL-UHFFFAOYSA-N	238.11	0.0581695	141.439
4-cyanobenzylamine	C8H8N2	LFIWXXXFJFOECP-UHFFFAOYSA-N	133.08	0.114053	154.738
4-fluoroamphetamine	C9H12FN	DGXWNDGLEOIEGT-UHFFFAOYSA-N	154.11	0.0917917	133.388
5-chloroquinoline	C9H6ClN	HJSRGOVAIOPERP-UHFFFAOYSA-N	164.51	0.00288919	120.032
5-chloro-2-methyl-8-quinolinol	C10H8ClNO	OPQODOXIDNYMKA-UHFFFAOYSA-N	194.52	0.0922819	180.481
5-cyano-2-methyl-8-quinolinol	C11H9N2O	NWUAFVKGPOBCOA-UHFFFAOYSA-N	185.07	0.0971658	187.504
5-fluoro-2-methyl-8-quinolinol	C10H9FNO	YMDMCOFPYPOKJD-UHFFFAOYSA-N	178.07	0.0749542	162.897
2,5-dimethyl-8-quinolinol	C11H12NO	GQUFSGXAEOXQJC-UHFFFAOYSA-N	174.09	0.0842181	146.283
5-nitro-2-methyl-8-quinolinol	C10H9N2O3	XYPACLZTPMHPLB-UHFFFAOYSA-N	205.06	0.0910143	191.246
5-methoxy-2-methyl-8-quinolinol	C11H12NO2	ZOUCJKGSXDLPFZ-UHFFFAOYSA-N	190.09	0.0932351	142.86
6-chloro-2-methyl-8-quinolinol	C10H8ClNO	DAWWEGRLXLVJHI-UHFFFAOYSA-N	194.52	0.0702283	141.766
6-cyano-2-methyl-8-quinolinol	C11H9N2O	NXAZQVAYIGFJML-UHFFFAOYSA-N	185.07	0.0837493	156.456
6-fluoro-2-methyl-8-quinolinol	C10H9FNO	HFLQAZUNFSXRSR-UHFFFAOYSA-N	178.07	0.0739434	142.399
2,6-dimethyl-quinoline	C11H11N	JJPSZKIOGBRMHK-UHFFFAOYSA-N	158.1	0.058933	119.994
2,6-dimethyl-8-quinolinol	C11H12NO	SQSBURBTMYAEBQ-UHFFFAOYSA-N	174.09	0.0716429	130.642
2-methyl-6-aminoquinoline	C10H10N2	TYJFYUVDUUACKX-UHFFFAOYSA-N	159.09	0.0459034	119.996
2-methyl-6-nitroquinoline	C10H8N2O2	DXDPHHQJZWWAEH-UHFFFAOYSA-N	189.07	0.0510193	137.061
6-nitro-2-methyl-8-quinolinol	C10H9N2O3	VUZFQYDNVUBSBS-UHFFFAOYSA-N	205.06	0.0979264	168.853
2-methyl-6-methoxyquinoline	C11H11NO	NAGJQQFMJKMXJQ-UHFFFAOYSA-N	158.1	0.0759688	136.634
6-methoxy-2-methyl-8-quinolinol	C11H12NO2	QAASNWWKJKQLSU-UHFFFAOYSA-N	190.09	0.0853356	135.655
2-methyl-6-chloroquinoline	C10H8ClN	OCCIBGIEIBQGAJ-UHFFFAOYSA-N	178.53	0.0559999	134.689
7-chloro-2-methyl-8-quinolinol	C10H8ClNO	QLHYQTWFNLIXMZ-UHFFFAOYSA-N	194.52	0.066493	150.97
7-cyano-2-methyl-8-quinolinol	C11H9N2O	KLCMWUIXAJXKTQ-UHFFFAOYSA-N	185.07	0.0806902	156.488
7-fluoro-2-methyl-8-quinolinol	C10H9FNO	DMEJUWFIFSHHNF-UHFFFAOYSA-N	178.07	0.0608693	137.003
2,7-dimethyl-8-quinolinol	C11H12NO	KLCMWUIXAJXKTQ-UHFFFAOYSA-N	174.09	0.0880399	153.042
7-nitro-2-methyl-8-quinolinol	C10H9N2O3	RPGLTRHHWBHDLV-UHFFFAOYSA-N	205.06	0.0747458	149.666
7-methoxy-2-methyl-8-quinolinol	C11H12NO2	USAQDQYASICRCI-UHFFFAOYSA-N	190.09	0.0826576	142.145
2-methyl-8-chloroquinoline	C10H8ClN	VVLYDFPOGMTMFJ-UHFFFAOYSA-N	178.53	0.0360156	121.03
2,8-dimethyl-quinoline	C11H11N	BELFSAVWJLQIBB-UHFFFAOYSA-N	158.1	0.043164	119.997
2-methyl-8-aminoquinoline	C10H10N2	JHIAOWGCGNMQKA-UHFFFAOYSA-N	159.09	0.0653994	136.855
2-methyl-8-nitroquinoline	C10H8N2O2	UHPGVDHXHDPYQP-UHFFFAOYSA-N	189.07	0.0479248	119.996
2-methyl-8-methoxyquinoline	C11H11NO	OQXVXPBDSJQYRR-UHFFFAOYSA-N	174.09	0.0697337	142.681
Acetaminophen	C8H9NO2	RZVAJINKPMORJF-UHFFFAOYSA-N	152.07	0.0660645	119.992
Acetamiprid	C10H11ClN4	WCXDHFDTOYPNIE-UHFFFAOYSA-N	223.56	0.0718103	145.544
Acibenzolar-S-methyl	C8H6N2OS2	UELITFHSCLAHKR-UHFFFAOYSA-N	211	0.0473208	201.983
Alanine	C3H7NO2	QNAYBMKLOCPYGJ-REOHCLBHSA-N	90.06	0.0296988	99.8506
Aminocarb	C11H16N2O2	IMIDOCRTMDIQIJ-UHFFFAOYSA-N	209.13	0.0772533	153.475
Amoxapine	C17H16ClN3O	QWGDMFLQWFTERH-UHFFFAOYSA-N	314.59	0.0587799	163.811
Aniline	C6H7N	PAYRUJLWNCNPSJ-UHFFFAOYSA-N	94.07	0	120.032
Benalaxyl	C20H23NO3	CJPQIRJHIZUAQP-UHFFFAOYSA-N	326.18	0.0397031	105.433
Bentazon	C10H12N2O3S	ZOMSMJKLGFBRBS-UHFFFAOYSA-N	241.07	0.0631424	141.068
Bifenazate	C17H20N2O3	VHLKTXFWDRXILV-UHFFFAOYSA-N	301.16	0.0880515	170.816
Buprofezin	C16H23N3OS	PRLVTUNWOQKEAI-UHFFFAOYSA-N	306.17	0.0650145	188.906
Butoxycarboxim	C7H14N2O4S	CTJBHIROCMPUKL-WEVVVXLNSA-N	223.08	0.0521684	120.003
Caffeine	C8H10N4O2	RYYVLZVUVIJVGH-UHFFFAOYSA-N	195.09	0.0579372	138.486
Carbendazim	C9H9N3O2	TWFZGCMQGLPBSX-UHFFFAOYSA-N	192.08	0.0210813	120.011
Carbetamide	C12H16N2O3	AMRQXHFXNZFDCH-SECBINFHSA-N	237.13	0.0617662	138.655
Carbofuran	C12H15NO3	DUEPRVBVGDRKAG-UHFFFAOYSA-N	222.12	0.0654419	198.604
Carboxin	C12H13NO2S	GYSSRZJIHXQEHQ-UHFFFAOYSA-N	236.08	0.112357	211.894
Chloroxuron	C15H15ClN2O2	IVUXTESCPZUGJC-UHFFFAOYSA-N	291.58	0.0225476	216.283
Chlortoluron	C10H13ClN2O	JXCGFZXSOMJFOA-UHFFFAOYSA-N	213.57	0.064111	163.478
Clenbuterol	C12H18Cl2N2O	STJMRWALKKWQGH-UHFFFAOYSA-N	278.06	0.0287571	155.986
Clofentezine	C14H8Cl2N4	UXADOQPNKNTIHB-UHFFFAOYSA-N	303.99	0.0637699	175.946
Clonidine	C9H9Cl2N3	GJSURZIOUXUGAL-UHFFFAOYSA-N	231	0.0472457	133.009
Cyazofamid	C13H13ClN4O2S	YXKMMRDKEKCERS-UHFFFAOYSA-N	325.54	0.0701829	174.625
Cycluron	C11H22N2O	DQZCVNGCTZLGAQ-UHFFFAOYSA-N	199.19	0.0545768	120.013
Cyprodinil	C14H15N3	HAORKNGNJCEJBX-UHFFFAOYSA-N	226.14	0.0400187	140.368
Cyromazine	C6H10N6	LVQDKIWDGQRHTE-UHFFFAOYSA-N	167.11	0.0738277	138.273
Dicrotophos	C8H16NO5P	VEENJGZXVHKXNB-VOTSOKGWSA-N	238.09	0.0754603	119.991
Diethofencarb	C14H21NO4	LNJNFVJKDJYTEU-UHFFFAOYSA-N	268.16	0.0658721	119.992
Dimethoate	C5H12NO3PS2	MCWXGJITAZMZEV-UHFFFAOYSA-N	230.01	0.00996893	120.024
Dimethomorph	C21H22ClNO4	QNBTYORWCCMPQP-NBVRZTHBSA-N	388.62	0.0588486	166.401
Dimetridazole	C5H7N3O2	IBXPYPUJPLLOIN-UHFFFAOYSA-N	142.06	0.0454322	95.6174
Dioxacarb	C11H13NO4	SDKQRNRRDYRQKY-UHFFFAOYSA-N	224.1	0.152811	223.654
Diuron	C9H10Cl2N2O	XMTQQYYKAHVGBJ-UHFFFAOYSA-N	234	0.0882147	204.232
Dopamine	C8H11NO2	VYFYYTLLBUKUHU-UHFFFAOYSA-N	154.09	0.114924	172.116
Etaconazole	C14H15Cl2N3O2	DWRKFAJEBUWTQM-UHFFFAOYSA-N	329.03	0.0559632	168.6
Ethofumesate	C13H18O5S	IRCMYGHHKLLGHV-UHFFFAOYSA-N	287.1	0.025976	120.004
Etoxazole	C21H23F2NO2	IXSZQYVWNJNRAL-UHFFFAOYSA-N	360.18	0.0261544	135.943
Famoxadon	C22H18N2O4	PCCSBWNGDMYFCW-UHFFFAOYSA-N	375.14	0.0407664	210.729
Fenamidone	C17H17N3OS	LMVPQMGRYSRMIW-KRWDZBQOSA-N	312.12	0.0550954	161.839
Fenarimol	C17H12Cl2N2O	NHOWDZOIZKMVAI-UHFFFAOYSA-N	332.01	0.0850759	215.371
Fenhexamid	C14H17Cl2NO2	VDLGAVXLJYLFDH-UHFFFAOYSA-N	303.04	0.067316	187.315
Fenobucarb	C12H17NO2	DIRFUJHNVNOBMY-UHFFFAOYSA-N	208.14	0.0697797	150.565
Fenoxycarb	C17H19NO4	HJUFTIJOISQSKQ-UHFFFAOYSA-N	302.14	0.0569507	151.568
Fenuron	C9H12N2O	XXOYNJXVWVNOOJ-UHFFFAOYSA-N	165.11	0.0372794	98.0169
Flusilazole	C16H15F2N3Si	FQKUGOMFVDPBIZ-UHFFFAOYSA-N	316.22	0.0531579	175.898
Flutriafol	C16H13F2N3O	JWUCHKBSVLQQCO-UHFFFAOYSA-N	302.11	0.0453591	119.997
Fuberidazole	C11H8N2O	UYJUZNLFJAWNEZ-UHFFFAOYSA-N	185.07	0.0962573	150.425
Furalaxyl	C17H19NO4	CIEXPHRYOLIQQD-UHFFFAOYSA-N	302.14	0.0254941	120.006
GABA	C4H9NO2	BTCSSZJGUNDROE-UHFFFAOYSA-N	104.07	0.0306692	56.0431
Glycine	C2H5NO2	DHMQDGOQFOQNFH-UHFFFAOYSA-N	76.04	0.0460926	189.596
Glycylproline	C7H12N2O3	KZNQNBZMBZJQJO-UHFFFAOYSA-N	173.1	0.0428929	95.7318
Hexaflumuron	C16H8Cl2F6N2O3	RGNPBRKPHBKNKX-UHFFFAOYSA-N	461.96	0.0115637	51.688
Ipconazole	C18H24ClN3O	QTYCMDBMOLSEAM-UHFFFAOYSA-N	334.66	0.0209318	120.012
Isoprocarb	C11H15NO2	QBSJMKIUCUGGNG-UHFFFAOYSA-N	194.12	0.0774678	139.649
Isoproturon	C12H18N2O	PUIYMUZLKQOUOZ-UHFFFAOYSA-N	207.15	0.0896525	147.903
Linuron	C9H10Cl2N2O2	XKJMBINCVNINCA-UHFFFAOYSA-N	249.99	0.064024	147.304
MDA	C10H13NO2	GBBVGZWCFBOGO-UHFFFAOYSA-N	180.11	0.0912332	119.987
Melamine	C3H6N6	JDSHMPZPIAZGSV-UHFFFAOYSA-N	127.07	0.00747904	23.2683
Meprobamate	C9H18N2O4	NPPQSCRMBWNHMW-UHFFFAOYSA-N	219.14	0.0232202	87.241
Mepronil	C17H19NO2	BCTQJXQXJVLSIG-UHFFFAOYSA-N	270.15	0.0561078	161.226
Methamphetamine	C10H15N	MYWUZJCMWCOHBA-VIFPVBQESA-N	150.13	0.0673238	129.154
Methiocarb	C11H15NO2S	YFBPRJGDJKVWAH-UHFFFAOYSA-N	226.09	0.0928784	160.874
Mevinphos	C7H13O6P	GEPDYQSQVLXLEU-AATRIKPKSA-N	225.06	0.0541361	103.663
Mexacarbate	C12H18N2O2	YNEVBPNZHBAYOA-UHFFFAOYSA-N	223.15	0.077428	153.745
Midazolam	C18H13ClFN3	DDLIGBOFAVUZHB-UHFFFAOYSA-N	326.57	0.0411084	154.662
Monolinuron	C9H11ClN2O2	LKJPSUCKSLORMF-UHFFFAOYSA-N	215.55	0.0849363	146.895
Monuron	C9H11ClN2O	BMLIZLVNXIYGCK-UHFFFAOYSA-N	199.55	0.0741941	138.032
Naloxone	C19H21NO4	UZHSEJADLWPNLE-GRGSLBFTSA-N	328.16	0.0547982	167.407
Niacinamide	C6H6N2O	DFPAKSUCGFBDDF-UHFFFAOYSA-N	123.06	0.0344988	73.9943
NicotinicAcid	C6H5NO2	PVNIIMVLHYAWGP-UHFFFAOYSA-N	124.04	0.0648308	2.76213
Norbuprenorphine	C25H35NO4	YOYLLRBMGQRFTN-IOMBULRVSA-N	414.27	0.051168	243.058
Norcodeine	C17H19NO3	HKOIXWVRNLGFOR-KOFBORESSA-N	286.15	0.0418498	162.764
Noroxycodone	C17H19NO4	RIKMCJUNPCRFMW-ISWURRPUSA-N	302.14	0.0398467	163.742
Norsertraline	C16H15Cl2N	SRPXSILJHWNFMK-ZBEGNZNMSA-N	293.04	0.0432136	164.705
Nortriptyline	C19H21N	PHVGLTMQBUFIQQ-UHFFFAOYSA-N	264.18	0.0574043	153.676
Nuarimol	C17H12ClFN2O	SAPGTCDSBGMXCD-UHFFFAOYSA-N	315.56	0.0762816	188.837
N-Desalkylflurazepam	C15H10ClFN2O	UVCOILFBWYKHHB-UHFFFAOYSA-N	289.54	0.0503877	149.516
Oxadixyl	C14H18N2O4	UWVQIROCRJWDKL-UHFFFAOYSA-N	279.14	0.0491079	109.877
Pencycuron	C19H21ClN2O	OGYFATSSENRIKG-UHFFFAOYSA-N	329.63	0.0667351	168.706
Phenacetin	C10H13NO2	CPJSUEIXXCENMM-UHFFFAOYSA-N	180.11	0.0796092	137.014
Pirimicarb	C11H18N4O2	YFGYUFNIOHWBOB-UHFFFAOYSA-N	239.15	0.148032	165.487
Proline	C5H9NO2	ONIBWKKTOPOVIA-BYPYZUCNSA-N	116.07	0.073079	121.887
Promecarb	C12H17NO2	DTAPQAJKAFRNJB-UHFFFAOYSA-N	208.14	0.0761089	143.636
Propoxur	C11H15NO3	ISRUGXGCCGIOQO-UHFFFAOYSA-N	210.12	0.0974393	154.335
Pyracarbolid	C13H15NO2	YPCALTGLHFLNGA-UHFFFAOYSA-N	218.12	0.0791817	152.548
Pyrimethanil	C12H13N3	ZLIBICFPKPWGIZ-UHFFFAOYSA-N	200.12	0.0575918	132.484
Quinoxyfen	C15H8Cl2FNO	WRPIRSINYZBGPK-UHFFFAOYSA-N	308.97	0.0645996	187.751
Rotenone	C23H22O6	JUVIOZPCNVVQFO-HBGVWJBISA-N	395.15	0.0336412	148.719
Safranine O	C20H19ClN4	OARRHUQTFTUEOS-UHFFFAOYSA-N	315.16	0.057241	153.784
Salicylic Acid	C7H6O3	YGSDEFSMJLZEOE-UHFFFAOYSA-N	139.04	0.0228238	80.7612
Sarcosine	C3H7NO2	FSYKKLYZXJSNPZ-UHFFFAOYSA-N	90.06	0.0641159	158.478
Spiroxamine	C18H35NO2	PUYXTUJWRLOUCW-UHFFFAOYSA-N	298.28	0.0476367	164.189
Thiobencarb	C12H16ClNOS	QHTQREMOGMZHJV-UHFFFAOYSA-N	258.56	0.0557711	141.776
Threonine	C4H9NO3	AYFVYJQAPQTCCC-GBXIJSLDSA-N	120.07	0.0598037	119.993
Thymine	C5H6N2O2	RWQNBRDOKXIBIV-UHFFFAOYSA-N	127.05	0.0424058	104.792
Tramadol	C16H25NO2	TVYLLZQTGLZFBW-ZBFHGGJFSA-N	264.2	0.0319422	115.844
Tricyclazole	C9H7N3S	DQJCHOQLCLEDLL-UHFFFAOYSA-N	190.05	0.0542252	163.676
Triticonazole	C17H20ClN3O	PPDBOQMNKNNODG-NTEUORMPSA-N	318.62	0.0684264	183.023
